# Supplementary material for: Two new photochromic supramolecular compositions based on viologen: photocontrolled fluorescence, aniline detection and inkless erasable printing performance
Source: Royal Society of Chemistry journal article supplement (doi:10.1039/d1nj04918f), 2021-12-06
Supplement: d1nj04918f1.pdf [file d1nj04918f1.pdf]

## Two new photochromic supramolecular compositions based on viologen: photocontrolled fluorescence, aniline detection and inkless erasable printing performance

Bai-Li Zhu<sup>a</sup>, Yun-Peng Jin<sup>a</sup>, Jian Jiang<sup>a</sup>, Ming-Hui Zuo<sup>a</sup>, Shu-Xin Cui<sup>a,\*</sup>

<sup>a</sup> Heilongjiang Key Laboratory of Photoelectric Functional Materials, College of Chemistry and Chemical Engineering, Mudanjiang Normal University, Mudanjiang 157011, People's Republic of China.

\* Corresponding author

Synthesis of 3-BCBPY·2Cl and 4-BCBPY·2Cl.

3-BCBPY·2Cl: Dissolve 4,4'-bipyridine (10 mmol, 1.56 g) and 3-cyanobenzyl chloride (20 mmol, 3.92 g) in 25mL of N, N'-dimethylformamide (DMF), and stir at 110°C for 6h. Filtration yielded a light yellow product. The obtained product was washed 3 times with hot DMF and recrystallized with methanol to finally obtain a pale yellow solid. The yield was 90%.

4-BCBPY·2Cl: The synthesis process is similar to 3-BCBPY·2Cl except that 4-cyanobenzyl chloride (20 mmol, 3.92 g) is used instead of 4-cyanobenzyl chloride (20 mmol, 3.92 g). A yellow solid is obtained. The yield was 90%.

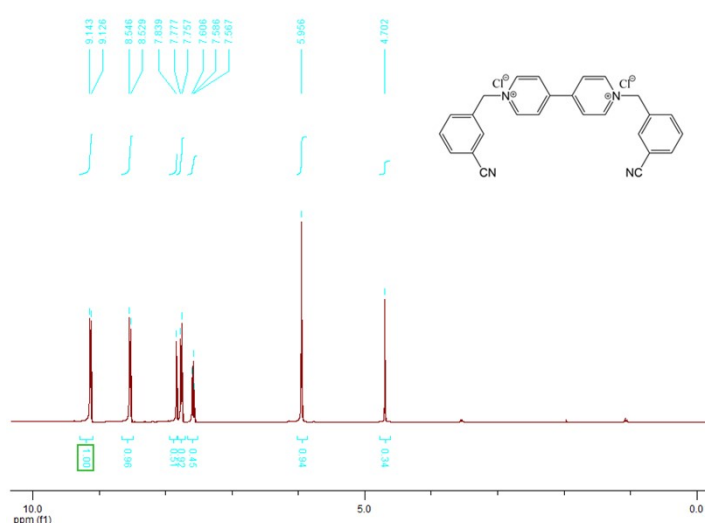

Figure S1. The <sup>1</sup>H NMR spectrum of 3-BCBPY·2Cl in D<sub>2</sub>O (600 MHz).

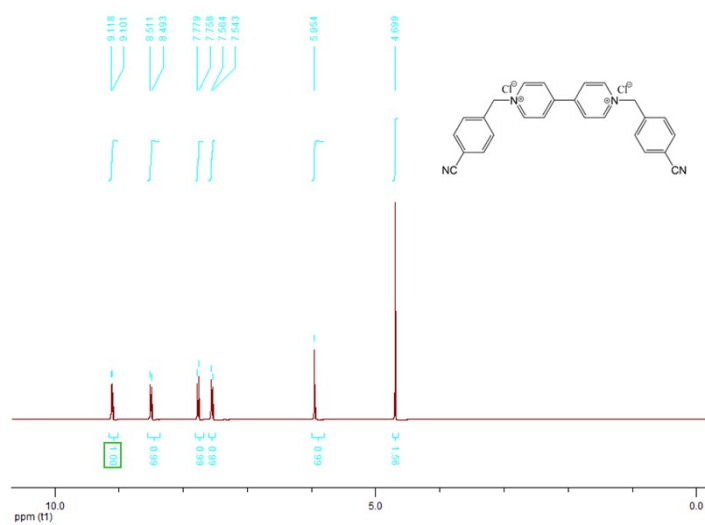

Figure S2. The  $^1\text{H}$  NMR spectrum of 4-BCBPY·2Cl in  $\text{D}_2\text{O}$  (600 MHz).

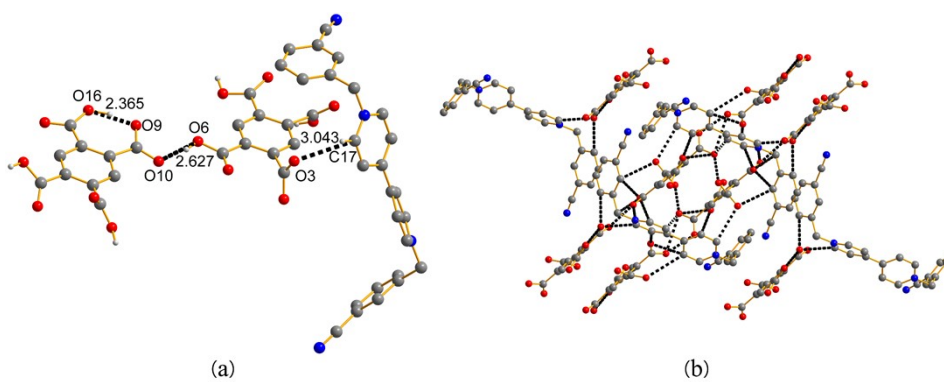

Figure S3. (a) Schematic diagram of partial hydrogen bond of Compound **1**; (b) The hydrogen bond network of Compound **1**.

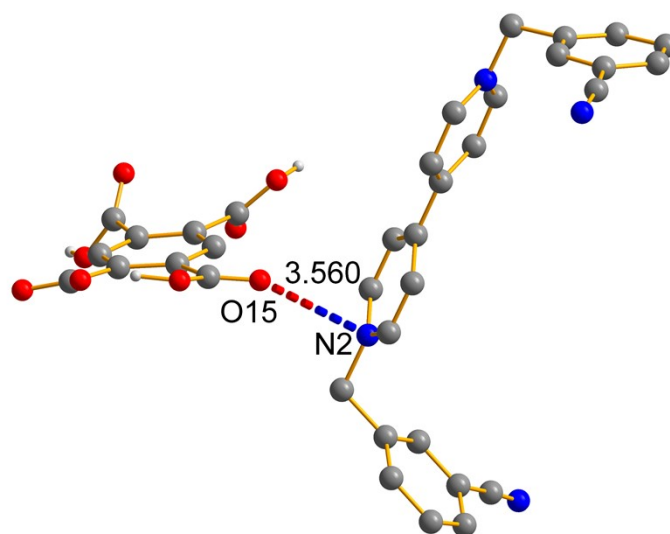

Figure S4. ET distances for Compound **1**.

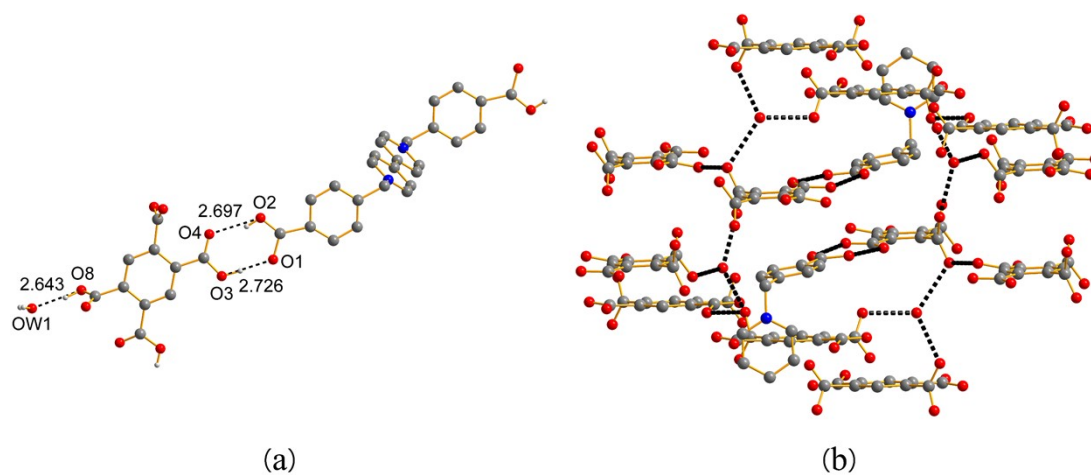

Figure S5. (a) Schematic diagram of partial hydrogen bond of Compound 2; (b) The hydrogen bond network of Compound 2.

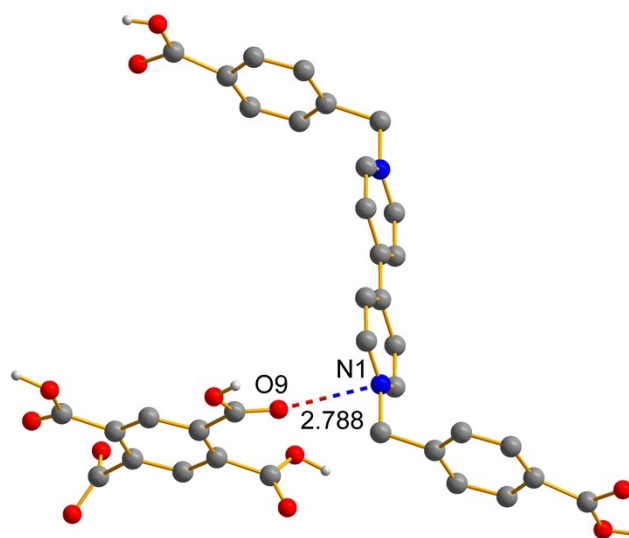

Figure S6. ET distances for Compound 2.

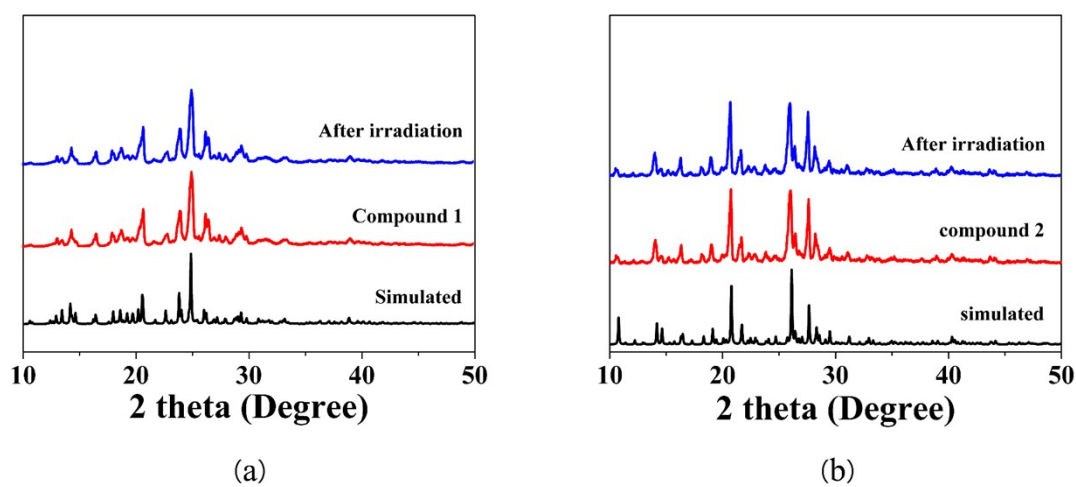

Figure S7. The PXRD spectra before and after irradiation for 1(a) and 2(b).

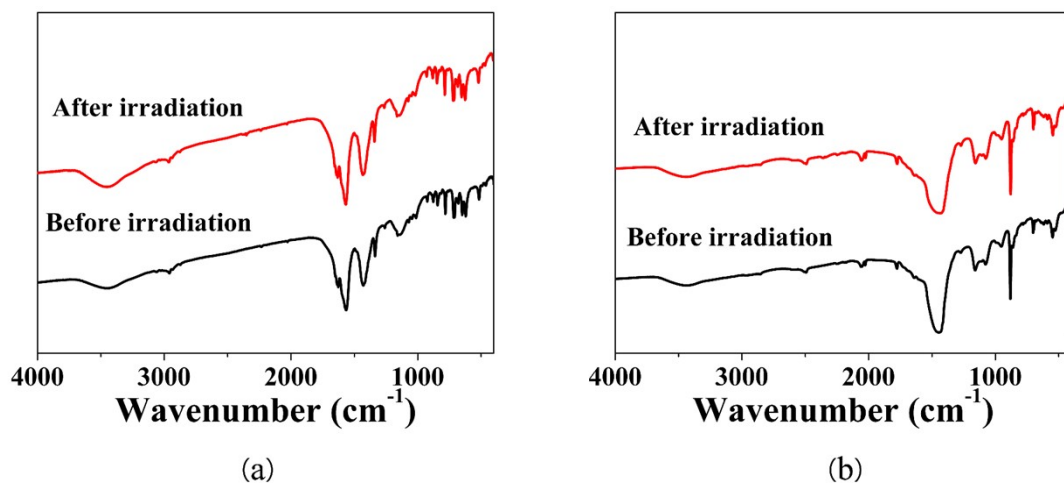

Figure S8. FT-IR spectra of Compounds 1(a) and 2(b).

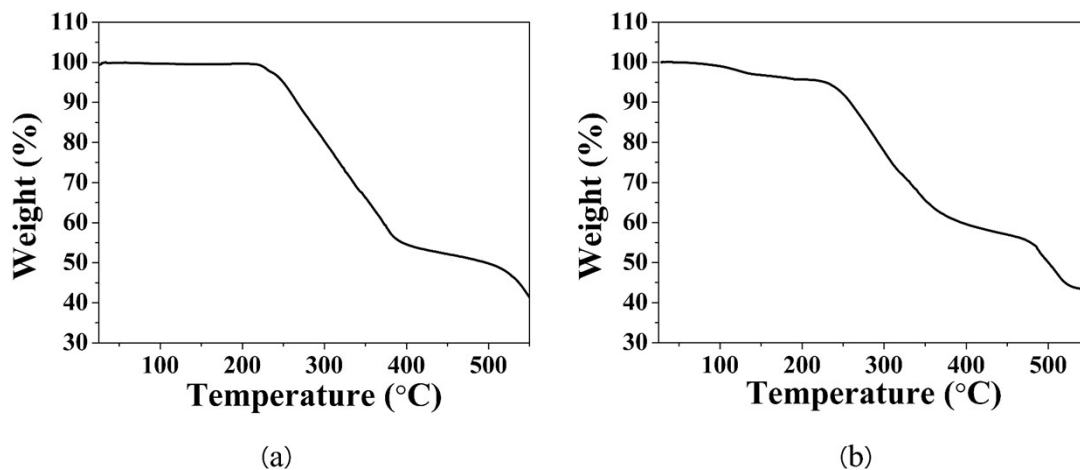

Figure S9. Thermogravimetric curves of Compounds 1(a) and 2(b).

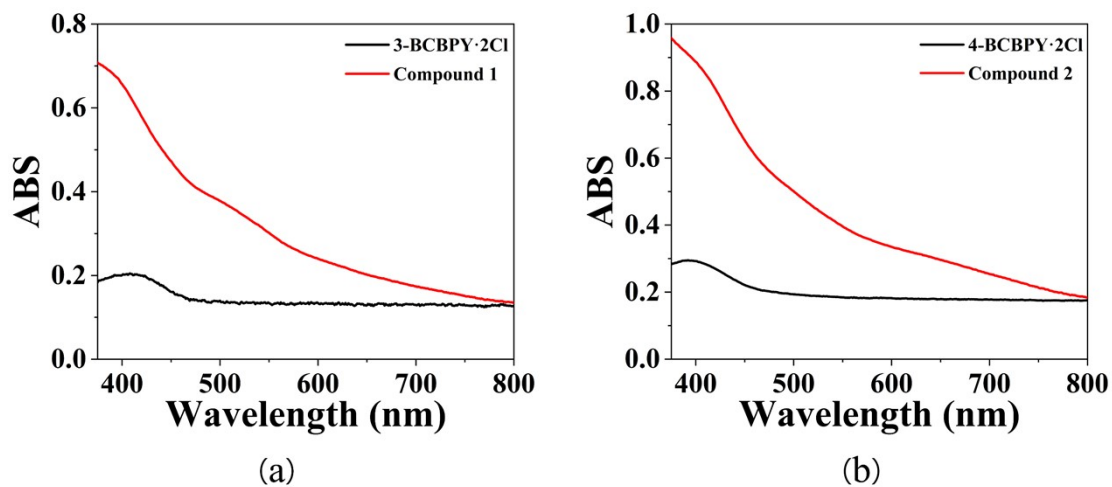

Figure S10. (a) UV-Vis spectra of 3-BCBPY.2Cl and compound 1; (b) UV-Vis spectra of 4-

BCBPY.2Cl and compound 2.

Compound 1

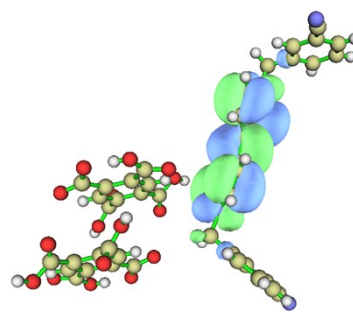

LUMO

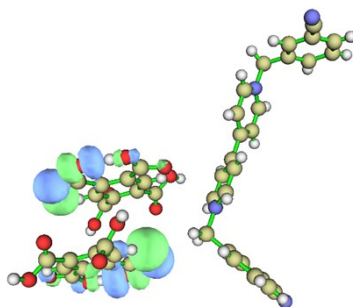

HOMO-1

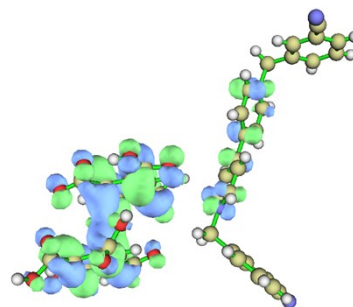

LUMO+1

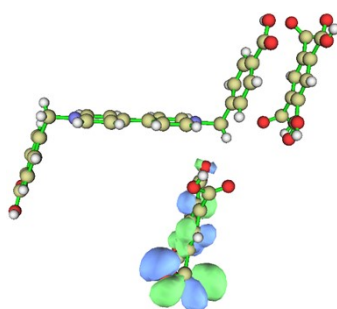

HOMO

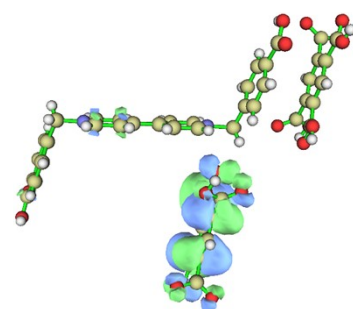

LUMO+4

Compound 2

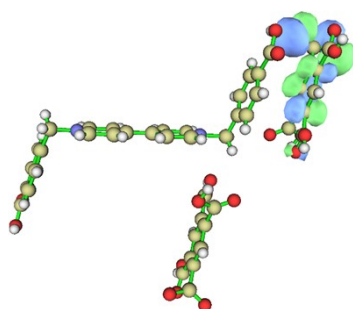

HOMO-1

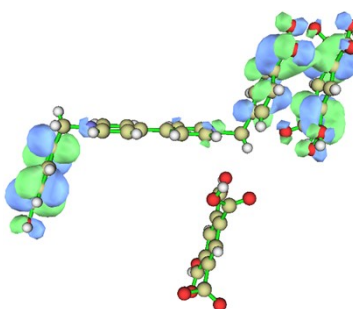

LUMO+3

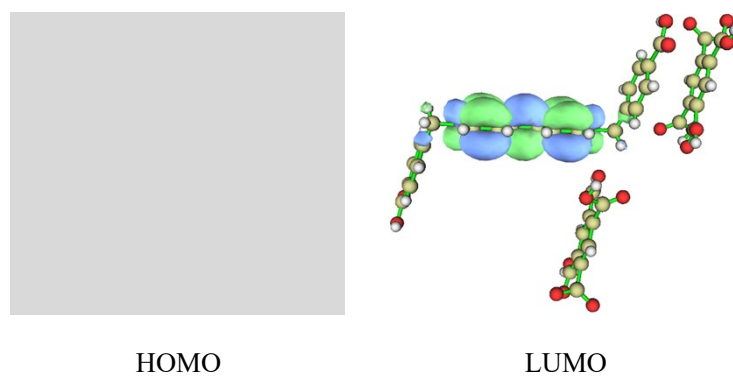

Figure S11. Calculated HOMO and LUMO orbitals of compounds **1** and **2**.

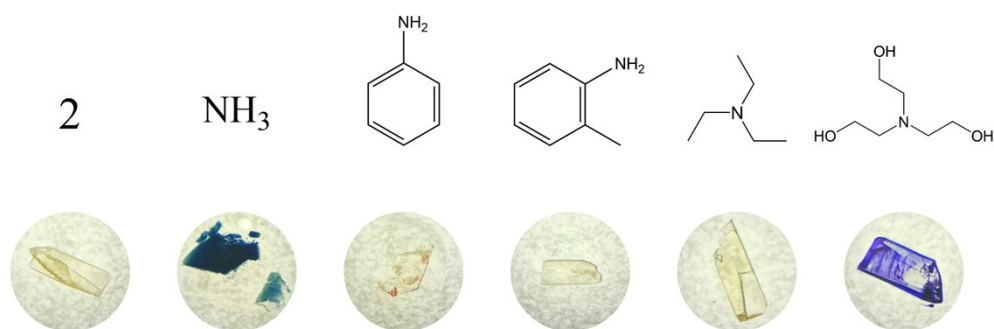

Figure S12. Photographs of Compound **2** before and after exposure to different amines.

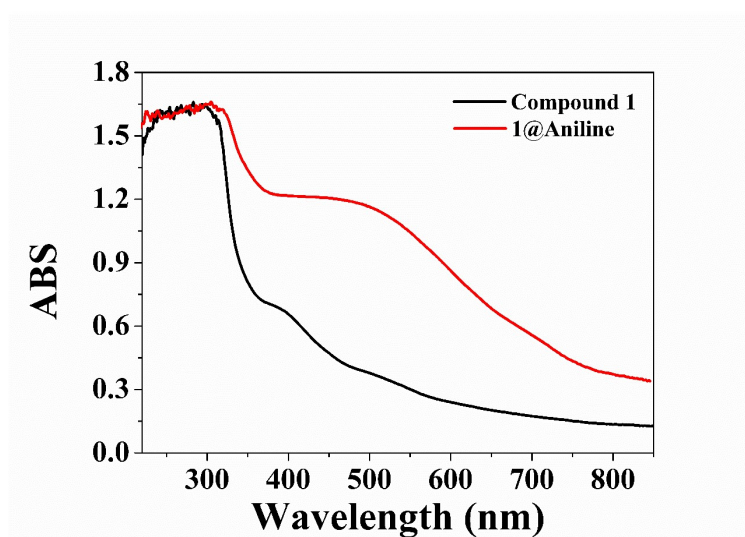

Figure S13. The UV-Vis spectra of Compounds **1** and **1@Aniline**.

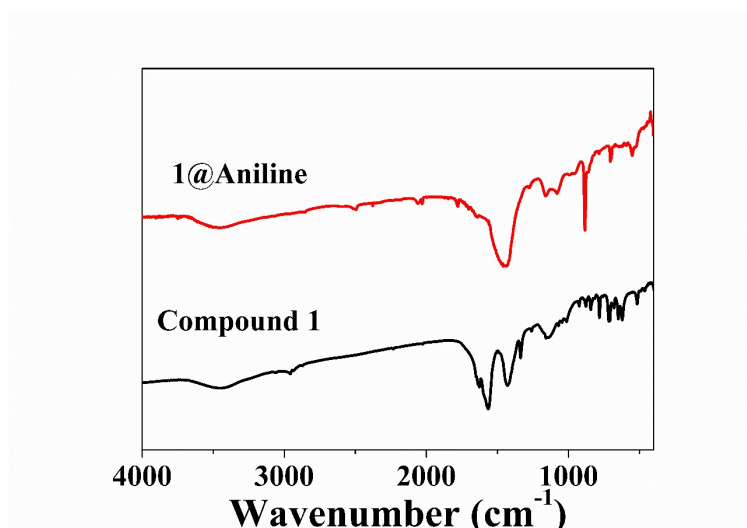

Figure S14. FT-IR spectra of Compound 1 and 1@Aniline.

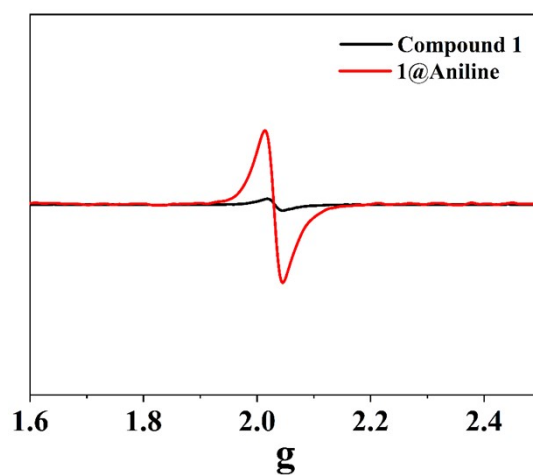

Figure S15. ESR spectra of Compounds 1 and 1@Aniline.

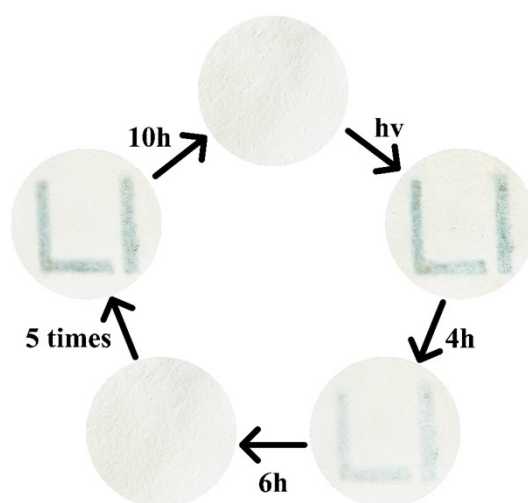

Figure S16. Photograph of 1@ethanol after repeated printing.

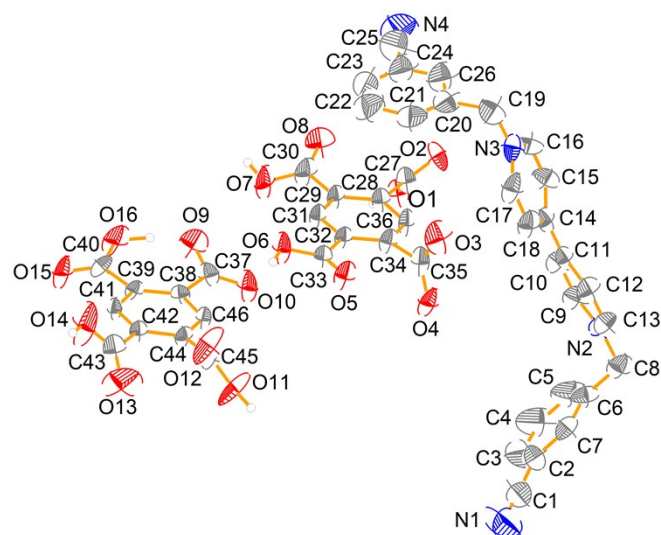

Figure S17. The asymmetric units of the structures (thermal ellipsoids) for Compound **1**.

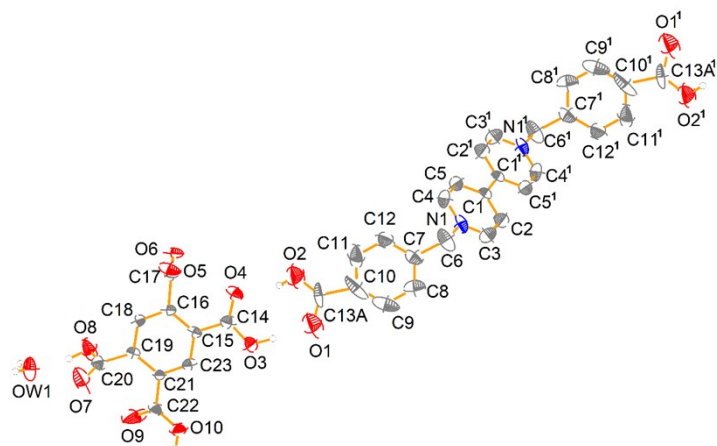

Figure S18. The asymmetric units of the structures (thermal ellipsoids) for Compound **2**

(Symmetry code:  $1/2-x, -y, -z$ ).



Table S1. Crystal data and structure refinement for **1** and **2**.

| Compound                                      | <b>1</b>                                                          | <b>2</b>                                                        |
|-----------------------------------------------|-------------------------------------------------------------------|-----------------------------------------------------------------|
| Empirical formula                             | C <sub>46</sub> H <sub>29.58</sub> N <sub>4</sub> O <sub>16</sub> | C <sub>46</sub> H <sub>35</sub> N <sub>2</sub> O <sub>21</sub>  |
| Formula weight                                | 894.32                                                            | 951.76                                                          |
| Temperature/K                                 | 296.15                                                            | 296.15                                                          |
| Crystal system                                | triclinic                                                         | monoclinic                                                      |
| Space group                                   | <i>P</i> -1                                                       | <i>P</i> 2 <sub>1</sub> / <i>c</i>                              |
| <i>a</i> /Å                                   | 9.7493(16)                                                        | 9.6809(14)                                                      |
| <i>b</i> /Å                                   | 14.816(2)                                                         | 15.526(2)                                                       |
| <i>c</i> /Å                                   | 14.827(2)                                                         | 13.6809(17)                                                     |
| $\alpha$ /°                                   | 81.262(3)                                                         | 90                                                              |
| $\beta$ /°                                    | 81.825(3)                                                         | 94.407(3)                                                       |
| $\gamma$ /°                                   | 72.098(3)                                                         | 90                                                              |
| Volume/Å <sup>3</sup>                         | 2003.9(5)                                                         | 2050.2(5)                                                       |
| <i>Z</i>                                      | 2                                                                 | 2                                                               |
| $\rho_{\text{calc}}/\text{cm}^3$              | 1.482                                                             | 1.542                                                           |
| $\mu/\text{mm}^{-1}$                          | 0.114                                                             | 0.124                                                           |
| $2\theta$ range for data collection/°         | 2.908 to 54.868                                                   | 3.974 to 55.382                                                 |
| Goodness-of-fit on <i>F</i> <sup>2</sup>      | 1.036                                                             | 1.062                                                           |
| Final R indexes [ <i>I</i> ≥ 2σ ( <i>I</i> )] | <i>R</i> <sub>1</sub> = 0.0910, <i>wR</i> <sub>2</sub> = 0.2500   | <i>R</i> <sub>1</sub> = 0.0896, <i>wR</i> <sub>2</sub> = 0.1823 |
| Final R indexes [all data]                    | <i>R</i> <sub>1</sub> = 0.1507, <i>wR</i> <sub>2</sub> = 0.2980   | <i>R</i> <sub>1</sub> = 0.2066, <i>wR</i> <sub>2</sub> = 0.2192 |

Table S2. O/C–H···O interactions Geometry (Å, °) for **1** and **2**.

|                           | D-H...A                    | d(D-H)                     | d(H...A) | d(D...A)  | <(DHA)   |       |
|---------------------------|----------------------------|----------------------------|----------|-----------|----------|-------|
| <b>Compound 1</b>         | C13-H13...O5 <sup>1</sup>  | 0.93                       | 2.34     | 3.175(5)  | 148.6    |       |
|                           | C13-H13...O1 <sup>2</sup>  | 0.93                       | 2.63     | 3.201(6)  | 120.1    |       |
|                           | C12-H12...O1 <sup>2</sup>  | 0.93                       | 2.55     | 3.161(6)  | 123.5    |       |
|                           | C12-H12...O1A <sup>2</sup> | 0.93                       | 2.24     | 3.143(9)  | 163.3    |       |
|                           | C10-H10...O13 <sup>3</sup> | 0.93                       | 2.16     | 3.088(6)  | 173.1    |       |
|                           | C18-H18...O8 <sup>2</sup>  | 0.93                       | 2.23     | 3.120(5)  | 159.6    |       |
|                           | C7-H7...O5 <sup>1</sup>    | 0.93                       | 2.57     | 3.402(6)  | 149.3    |       |
|                           | C7-H7...O3 <sup>1</sup>    | 0.93                       | 2.58     | 3.313(6)  | 135.9    |       |
|                           | C9-H9...O9 <sup>4</sup>    | 0.93                       | 2.31     | 3.220(6)  | 165.2    |       |
|                           | C15-H15...O12 <sup>3</sup> | 0.93                       | 2.42     | 3.332(6)  | 165.5    |       |
|                           | C15-H15...O13 <sup>3</sup> | 0.93                       | 2.75     | 3.380(7)  | 126.0    |       |
|                           | C8-H8A...O5 <sup>1</sup>   | 0.97                       | 2.59     | 3.389(5)  | 139.3    |       |
|                           | C17-H17...O3               | 0.93                       | 2.42     | 3.043(7)  | 124.1    |       |
|                           | O1-H1...O4 <sup>4</sup>    | 0.82                       | 1.62     | 2.373(6)  | 151.7    |       |
|                           | C16-H16...N4 <sup>5</sup>  | 0.93                       | 2.35     | 3.219(10) | 156.0    |       |
|                           | C5-H5...O9 <sup>4</sup>    | 0.93                       | 2.59     | 3.351(6)  | 139.6    |       |
|                           | O16-H16A...O9              | 1.04(5)                    | 1.34(5)  | 2.364(5)  | 168(4)   |       |
|                           | O6-H6...O10                | 0.88(6)                    | 1.76(6)  | 2.627(4)  | 170(6)   |       |
|                           | O11-H11...O15 <sup>2</sup> | 1.00(7)                    | 1.72(7)  | 2.704(4)  | 168(6)   |       |
|                           | O11-H11...O16 <sup>2</sup> | 1.00(7)                    | 2.52(7)  | 3.152(5)  | 121(5)   |       |
|                           | O14-H14...O2 <sup>6</sup>  | 0.86(2)                    | 1.79(2)  | 2.649(6)  | 177(7)   |       |
|                           | O14-H14...O1 <sup>6</sup>  | 0.86(2)                    | 2.54(6)  | 3.093(7)  | 123(5)   |       |
|                           | O14-H14...O2A <sup>6</sup> | 0.86(2)                    | 2.03(4)  | 2.797(10) | 148(6)   |       |
|                           | O14-H14...O1A <sup>6</sup> | 0.86(2)                    | 2.36(5)  | 3.009(9)  | 133(6)   |       |
|                           | O7-H7A...O4 <sup>7</sup>   | 0.84(2)                    | 1.91(5)  | 2.678(4)  | 152(9)   |       |
|                           | <b>Compound 2</b>          | OW1-HW1A...O5 <sup>1</sup> | 0.85     | 1.86      | 2.685(5) | 162.3 |
|                           |                            | OW1-HW1B...O6 <sup>2</sup> | 0.85     | 1.99      | 2.798(4) | 158.3 |
| O2-H2A...O4               |                            | 0.82                       | 1.91     | 2.697(8)  | 159.6    |       |
| O8-H8A...OW1              |                            | 0.92(5)                    | 1.77(6)  | 2.644(5)  | 158(5)   |       |
| O10-H10...O6 <sup>3</sup> |                            | 0.84(6)                    | 1.74(6)  | 2.572(4)  | 171(6)   |       |
| O3-H3A...O1               |                            | 0.98(7)                    | 1.75(7)  | 2.727(5)  | 176(6)   |       |

Symmetry codes of 1: <sup>1</sup>2-x, 1-y, 1-z; <sup>2</sup>1+x, +y, +z; <sup>3</sup>+x, -1+y, 1+z; <sup>4</sup>1-x, 1-y, 1-z; <sup>5</sup>1-x, -y, 1-z; <sup>6</sup>+x, 1+y, -1+z; <sup>7</sup>-1+x, +y, +z.

Symmetry codes of 2: <sup>1</sup>1-x, 2-y, 1-z; <sup>2</sup>1-x, 1/2+y, 1/2-z; <sup>3</sup>-1+x, +y, +z.

Table S3. Atomic Occupancy for **1** and **2**.

|                   | <b>Atom</b> | <b>Occupancy</b> |
|-------------------|-------------|------------------|
| <b>Compound 1</b> | O1          | 0.584(8)         |
|                   | O1A         | 0.416(8)         |
|                   | O2          | 0.584(8)         |
|                   | O2A         | 0.416(8)         |
|                   | H1          | 0.584(8)         |
| <b>Compound 2</b> | C13A        | 0.497(11)        |
|                   | C13B        | 0.503(11)        |
|                   | O2          | 0.5              |
|                   | H2A         | 0.5              |

Table S4. Results of the TDDFT/B3LYP-lanl2dz calculations related to **1** and **2**.

|                   | Excited states | Orbital description                             | $\lambda_{\text{max}} / \text{nm}$ |       | f      |
|-------------------|----------------|-------------------------------------------------|------------------------------------|-------|--------|
|                   |                |                                                 | Exp.                               | Calc. |        |
| Compound <b>1</b> | 8              | HOMO <sub>-1</sub> →LUMO (51.20%)               | 404                                | 364   | 0.0034 |
|                   | 2              | HOMO <sub>-1</sub> →LUMO <sub>+1</sub> (54.24%) | 618                                | 514   | 0.0001 |
| Compound <b>2</b> | 8              | HOMO→LUMO <sub>+4</sub> (64.78%)                | 406                                | 377   | 0.0737 |
|                   | 7              | HOMO <sub>-1</sub> →LUMO <sub>+3</sub> (46.67%) |                                    | 379   | 0.0651 |
|                   | 1              | HOMO→LUMO (70.67%)                              | 624                                | 622   | 0.0001 |
